# Supplementary material for: Cardiac Phenotype of Prehypertrophic Fabry Disease
Source: PubMed Central journal article supplement — Circ Cardiovasc Imaging. 2018 May 31;11(6):e007168. doi: 10.1161/CIRCIMAGING.117.007168 (PMC6023585; doi:10.1161/circimaging.117.007168), 2018-05-31
Supplement: hci-11-e007168-s001.pdf [file hci-11-e007168-s001.pdf]

**SUPPLEMENTAL MATERIAL**

| <b>Mutations</b>                                                                                                                                                                                                                                             | <b>Number of patients</b> |
|--------------------------------------------------------------------------------------------------------------------------------------------------------------------------------------------------------------------------------------------------------------|---------------------------|
| N215S                                                                                                                                                                                                                                                        | 29                        |
| P205T                                                                                                                                                                                                                                                        | 5                         |
| R227X                                                                                                                                                                                                                                                        | 4                         |
| A143T                                                                                                                                                                                                                                                        | 3                         |
| I91T                                                                                                                                                                                                                                                         | 3                         |
| Q107X                                                                                                                                                                                                                                                        | 3                         |
| c.1072_1074del                                                                                                                                                                                                                                               | 2                         |
| c.1033_1034delTC                                                                                                                                                                                                                                             | 2                         |
| D92H                                                                                                                                                                                                                                                         | 2                         |
| G411D                                                                                                                                                                                                                                                        | 2                         |
| L106F                                                                                                                                                                                                                                                        | 2                         |
| L166S                                                                                                                                                                                                                                                        | 2                         |
| N33D                                                                                                                                                                                                                                                         | 2                         |
| R118C                                                                                                                                                                                                                                                        | 2                         |
| R301Q                                                                                                                                                                                                                                                        | 2                         |
| T410I                                                                                                                                                                                                                                                        | 2                         |
| W340X                                                                                                                                                                                                                                                        | 2                         |
| A377D, c.1223delA, c.123del C, c.1156_1157delCA, c.139dupT, c.748_801+8del62, C52G, D33G, E338K, E48Q, G261D, G361A, G373D, I303N, IVS3+1G>A, N263S, N320H, N370S, P293H, Q146P, Q321X, R112H, R227Q, R342Q, R356Q, V269A, V316E, W209X, W227X, Y134S, Y200C | 1                         |

**Supplemental Table:** Mutations of Fabry Disease patients.

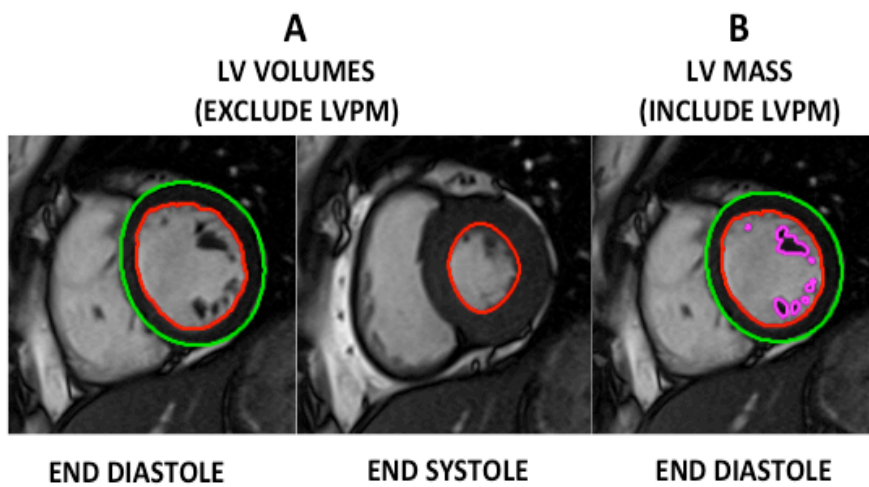

**Supplemental Figure 1:** A) A single short axis example of LV volume assessment showing epicardial and endocardial contours excluding the LVPM. B) Epicardial and endocardial contours including manual contours of the LVPM for LV mass assessment.

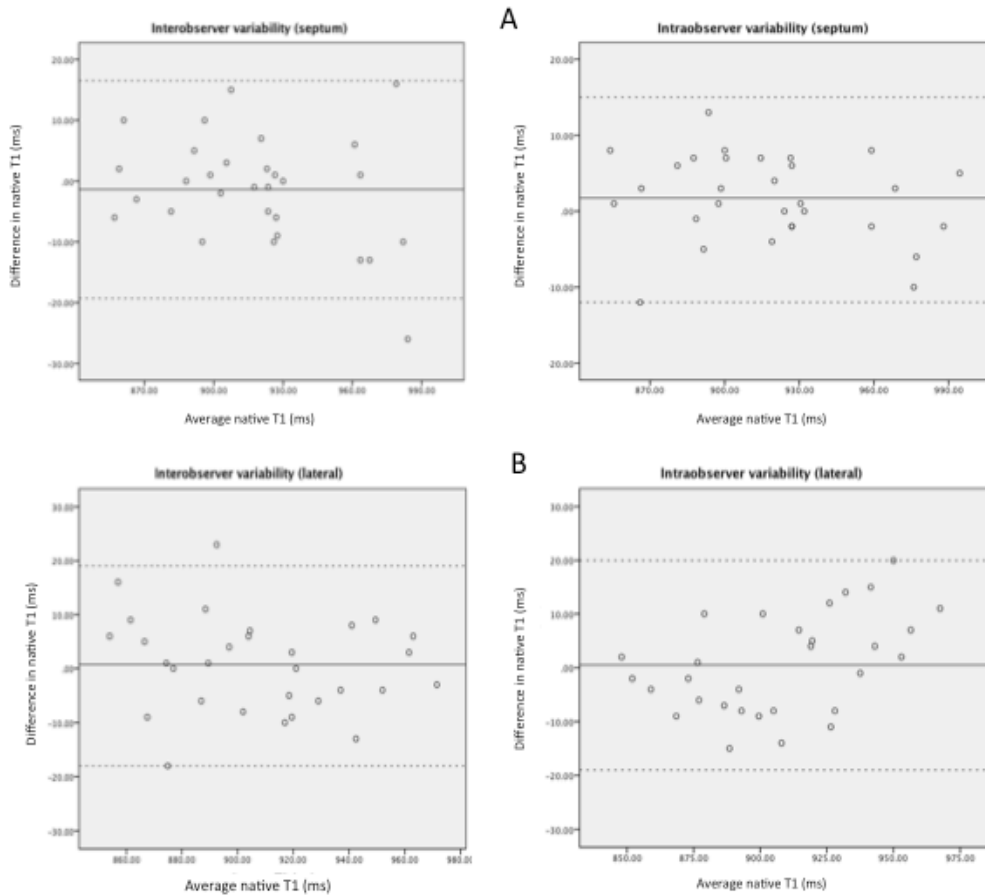

**Supplemental Figure 2:** Bland Altman graphs of native T1 analyses of (A) inter-observer and intra-observer variability at the septum, and (B) inter-observer and intra-observer variability of the other segments apart from septum. The mean difference of each plot is shown as a solid line and the upper and lower limits of 95%
